# Supplementary material for: Pruning deep neural networks generates a sparse, bio-inspired nonlinear controller for insect flight
Source: PubMed Central journal article supplement (PMC9543948; doi:10.1371/journal.pcbi.1010512), 2022-09-27

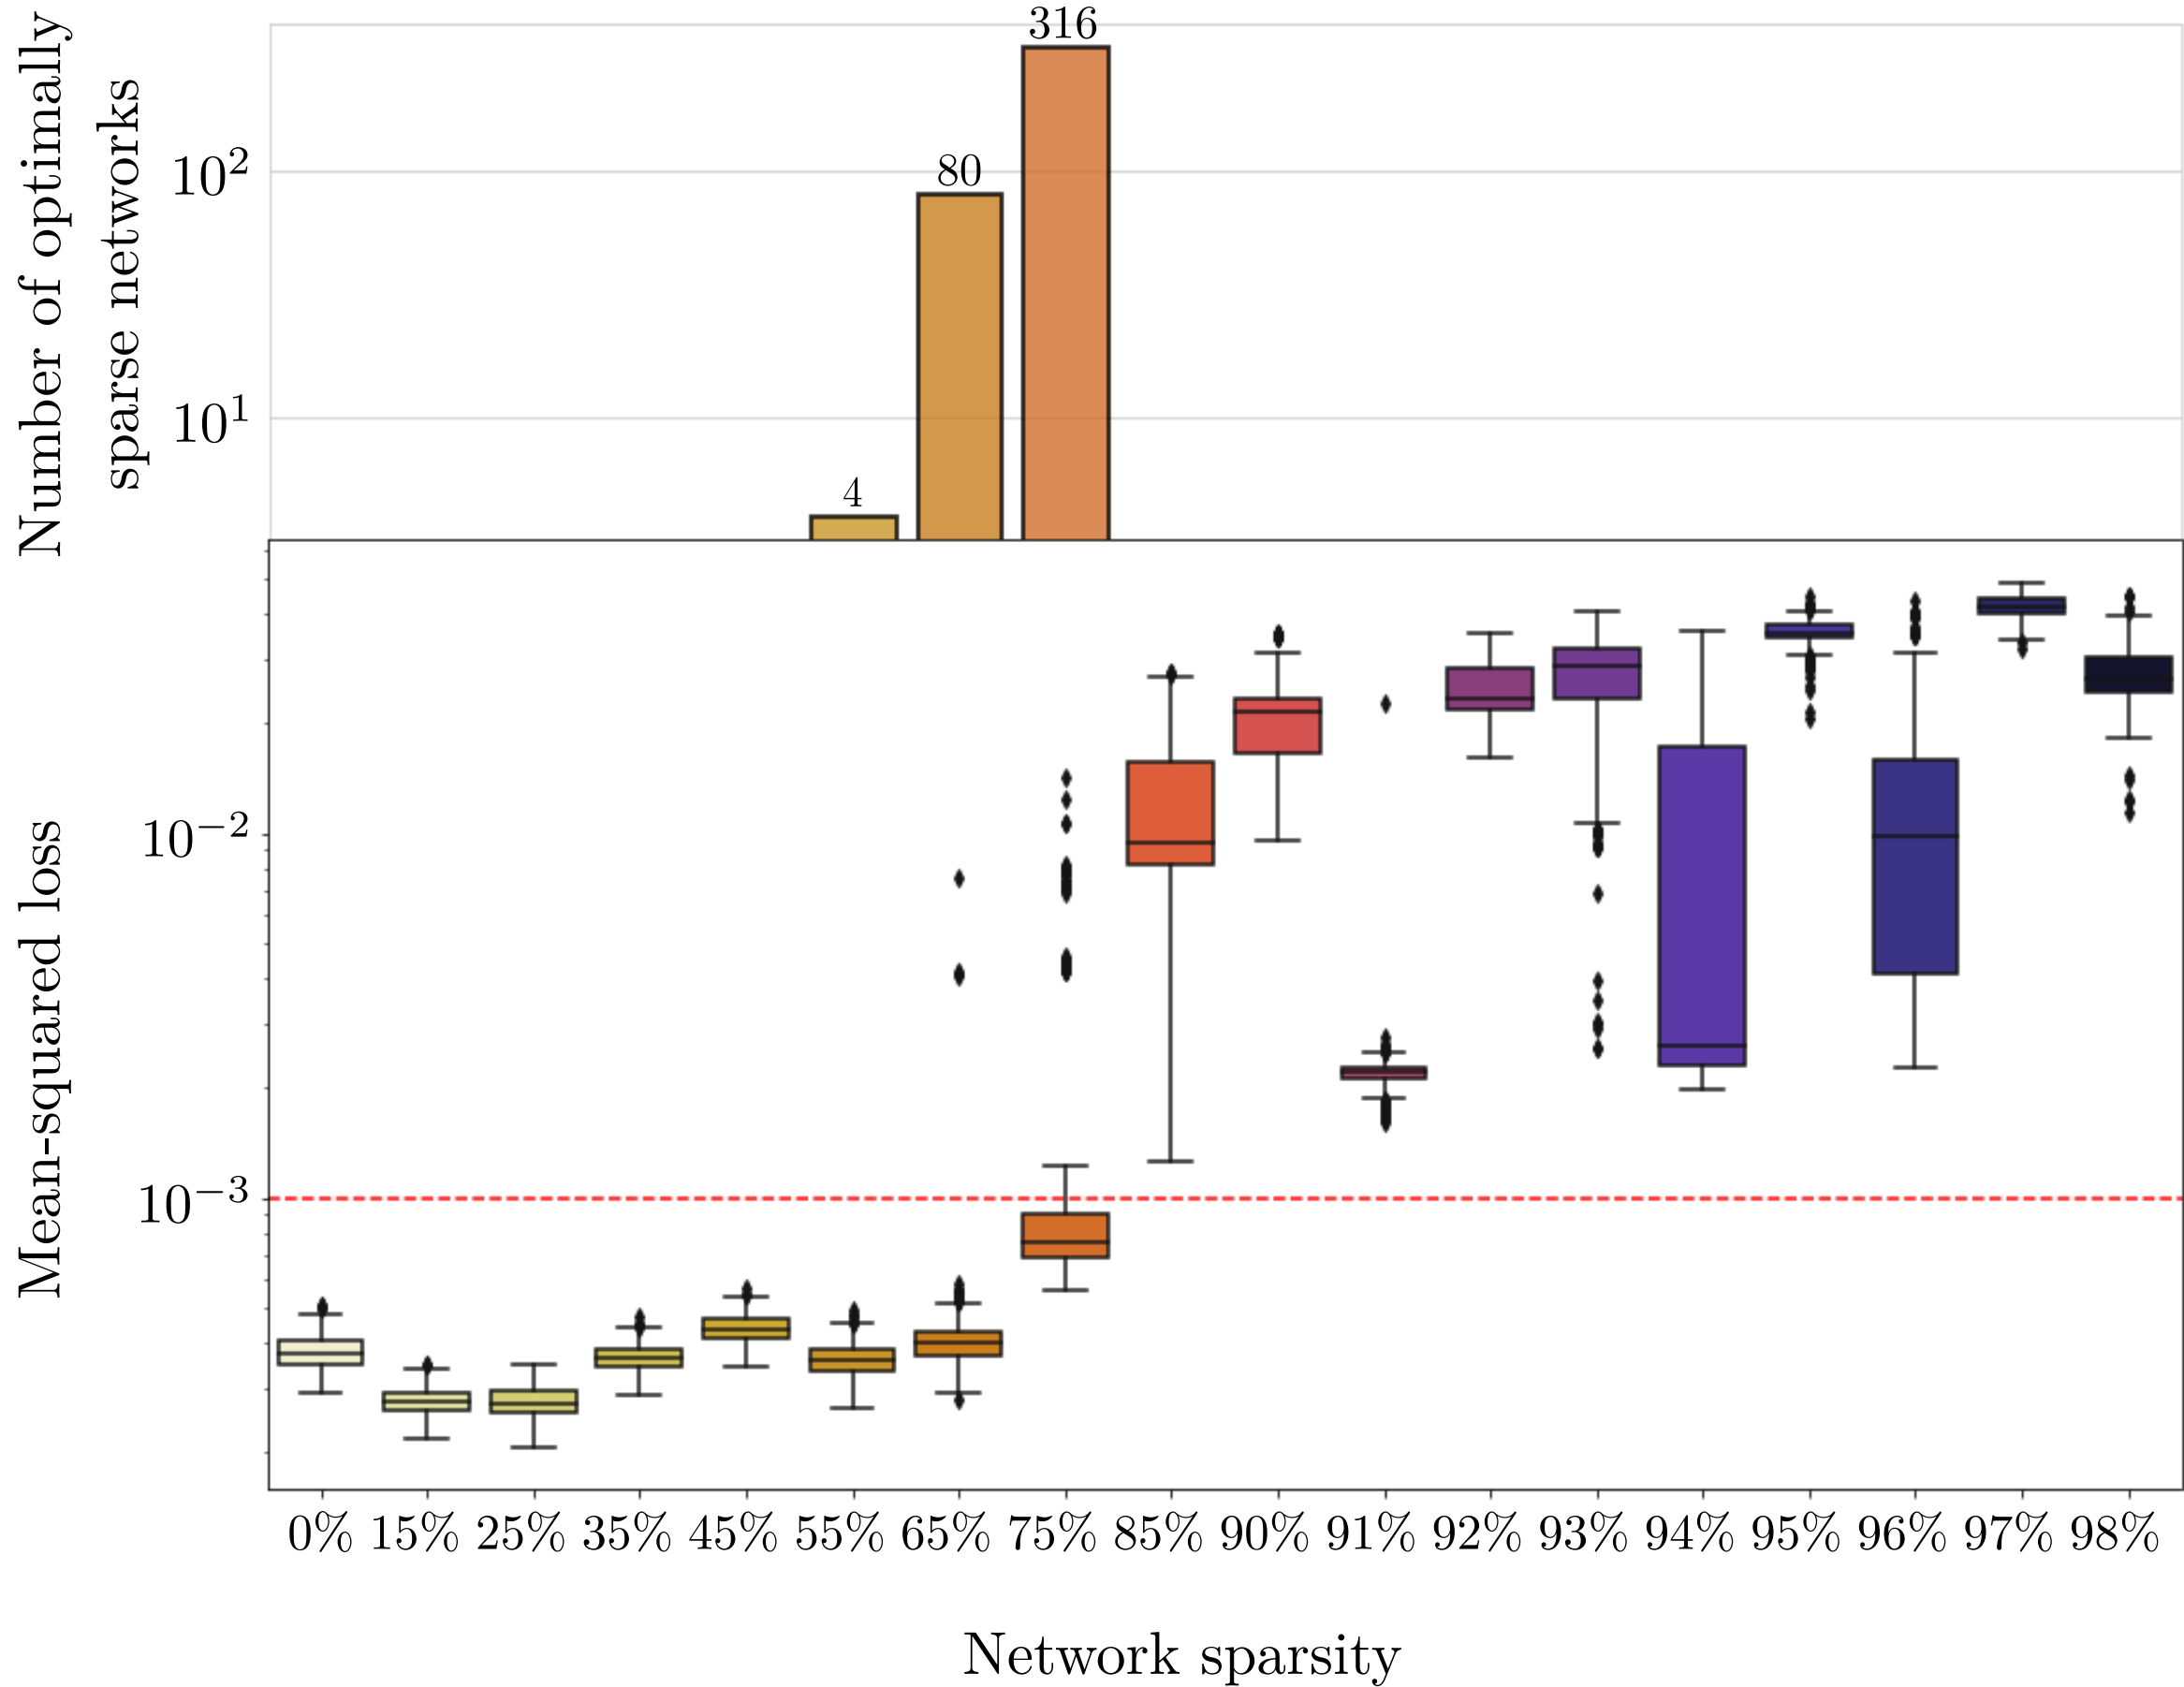

Supplement: pcbi.1010512.s002.pdf [file pcbi.1010512.s002.pdf]
