# Supplementary material for: Pruning deep neural networks generates a sparse, bio-inspired nonlinear controller for insect flight
Source: PubMed Central journal article supplement (PMC9543948; doi:10.1371/journal.pcbi.1010512), 2022-09-27
Supplement: pcbi.1010512.s006.pdf [file pcbi.1010512.s006.pdf]

**Global parameters for the moth model.** Below, we show a table of all the required parameters to recreate the simulated model of a moth.

| <b>Label</b>  | <b>Value</b> | <b>Units</b>                             | <b>Description</b>                                                                                            |
|---------------|--------------|------------------------------------------|---------------------------------------------------------------------------------------------------------------|
| $L1$          | 0.9          | cm                                       | Length from the thorax-abdomen joint to the center of mass of the head-thorax                                 |
| $L2$          | 1.9          | cm                                       | Length from the thorax-abdomen joint to the center of mass of the abdomen                                     |
| $L3$          | 0.75         | cm                                       | Length from the thorax-abdomen joint to the aerodynamic force vector                                          |
| $\rho_{head}$ | 0.9          | g/cm <sup>2</sup>                        | The density of the insect head-thorax                                                                         |
| $\rho_{butt}$ | 0.4          | g/cm <sup>2</sup>                        | The density of the insect abdomen                                                                             |
| $\rho_A$      | 0.00118      | g/cm <sup>3</sup>                        | The density of air                                                                                            |
| $\mu_A$       | 0.000186     | g/cm·s                                   | The dynamic viscosity of air at 27°C                                                                          |
| $a_{head}$    | 0.9          | cm                                       | Length of 1/2 major axis of head-thorax ellipsoid                                                             |
| $a_{butt}$    | 1.9          | cm                                       | Length of 1/2 of major axis of abdomen ellipsoid                                                              |
| $b_{head}$    | 0.5          | cm                                       | Length of 1/2 of minor axis of head-thorax ellipsoid                                                          |
| $b_{butt}$    | 0.75         | cm                                       | Length of 1/2 of minor axis of abdomen ellipsoid                                                              |
| $K$           | 23000        | cm <sup>2</sup> ·g/(rad·s <sup>2</sup> ) | Torsional spring constant of the thorax-abdomen joint                                                         |
| $c$           | 14075.8      | cm <sup>2</sup> ·g/s                     | Torsional damping constant of the thorax-abdomen joint                                                        |
| $g$           | 14075.8      | cm/s <sup>2</sup>                        | Acceleration due to gravity                                                                                   |
| $\beta_R$     | 0            | rad                                      | Resting configuration of the torsional spring = (initial abdomen angle) - (initial head-thorax angle) - $\pi$ |
| $t$           | 0.02         | s                                        | Time step                                                                                                     |
