# Supplementary material for: Pruning deep neural networks generates a sparse, bio-inspired nonlinear controller for insect flight
Source: PubMed Central journal article supplement (PMC9543948; doi:10.1371/journal.pcbi.1010512), 2022-09-27
Supplement: pcbi.1010512.s007.pdf [file pcbi.1010512.s007.pdf]

**Calculated variables for moth model.** Below, we show a table of all the required calculated variables to recreate the simulated model of a moth.

| Variable    | Expression                                                                 | Units             | Description                                                                  |
|-------------|----------------------------------------------------------------------------|-------------------|------------------------------------------------------------------------------|
| $m_1$       | $\rho_{head} \cdot \frac{4}{3}\pi \cdot (b_{head})^2 \cdot a_{head}$       | g                 | Mass of head-thorax                                                          |
| $m_2$       | $\rho_{butt} \cdot \frac{4}{3}\pi \cdot (b_{butt})^2 \cdot a_{butt}$       | g                 | Mass of the abdomen                                                          |
| $ec_{head}$ | $a_{head}/b_{head}$                                                        | N/A               | Eccentricity of head-thorax                                                  |
| $ec_{butt}$ | $a_{butt}/b_{butt}$                                                        | N/A               | Eccentricity of abdomen                                                      |
| $I_1$       | $\frac{1}{5}m_1 \cdot (b_{head})^2 \cdot (1 + (ec_{head})^2)$              | g·cm <sup>2</sup> | Moment of inertia of the head-thorax                                         |
| $I_2$       | $\frac{1}{5}m_2 \cdot (b_{butt})^2 \cdot (1 + (ec_{butt})^2)$              | g·cm <sup>2</sup> | Moment of inertia of the abdomen                                             |
| $S_{head}$  | $\pi \cdot (b_{head})^2$                                                   | cm <sup>2</sup>   | Surface area of the head-thorax. In this case, it is modeled as a sphere.    |
| $S_{butt}$  | $\pi \cdot (b_{butt})^2$                                                   | cm <sup>2</sup>   | <b>Surface area of the abdomen. In this case, it is modeled as a sphere.</b> |
| $Re_{head}$ | $\rho_A \cdot \sqrt{\dot{x}^2 + \dot{y}^2} \cdot (2 \cdot b_{head})/\mu_A$ | N/A               | Reynolds number for the head-thorax                                          |
| $Re_{butt}$ | $\rho_A \cdot \sqrt{\dot{x}^2 + \dot{y}^2} \cdot (2 \cdot b_{butt})/\mu_A$ | N/A               | Reynolds number for the abdomen                                              |
| $Cd_{head}$ | $24/ Re_{head}  + 6/(1 + \sqrt{ Re_{head} }) + 0.4$                        | N/A               | Coefficient of drag for the head-thorax                                      |
| $Cd_{butt}$ | $24/ Re_{butt}  + 6/(1 + \sqrt{ Re_{butt} }) + 0.4$                        | N/A               | Coefficient of drag for the abdomen                                          |
