# Supplementary material for: Pruning deep neural networks generates a sparse, bio-inspired nonlinear controller for insect flight
Source: PubMed Central journal article supplement (PMC9543948; doi:10.1371/journal.pcbi.1010512), 2022-09-27
Supplement: pcbi.1010512.s008.pdf [file pcbi.1010512.s008.pdf]

**Initial state space and controls for generating training data.** The following variables are the required state space and control variables along with their ranges for random uniform sampling.

| Var.             | Distribution            | Units                   | Variable type | Description                          |
|------------------|-------------------------|-------------------------|---------------|--------------------------------------|
| $x_0$            | 0                       | cm                      | State Space   | Initial horizontal position          |
| $\dot{x}_0$      | $Unif(-1500, 1500)$     | cm/s                    | State space   | Initial horizontal velocity          |
| $y_0$            | 0                       | cm                      | State space   | Initial vertical position            |
| $\dot{y}_0$      | $Unif(-1500, 1500)$     | cm/s                    | State space   | Initial vertical velocity            |
| $\theta_0$       | $Unif(0, 2\pi)$         | rad                     | State space   | Initial head-thorax angle            |
| $\dot{\theta}_0$ | $Unif(-25, 25)$         | rad/s                   | State space   | Initial head-thorax angular velocity |
| $\phi_0$         | $Unif(0, 2\pi)$         | rad                     | State Space   | Initial abdomen angle                |
| $\dot{\phi}_0$   | $Unif(-25, 25)$         | rad/s                   | State space   | Initial abdomen angular velocity     |
| $F$              | $Unif(0, 44300)$        | g·cm/s <sup>2</sup>     | Control       | Force magnitude                      |
| $\alpha$         | $Unif(0, 2\pi)$         | rad                     | Control       | Force angle                          |
| $\tau$           | $Unif(-100000, 100000)$ | g·cm/s <sup>2</sup> ·cm | Control       | Torque                               |
