# Supplementary material for: Pruning deep neural networks generates a sparse, bio-inspired nonlinear controller for insect flight
Source: PubMed Central journal article supplement (PMC9543948; doi:10.1371/journal.pcbi.1010512), 2022-09-27
Supplement: pcbi.1010512.s009.pdf [file pcbi.1010512.s009.pdf]

**Final state space variables** The following variables are the output from the differential equation solver. These variables describe the final state space of the insect after 20ms.

| <b>Variable</b>  | <b>Units</b> | <b>Description</b>                 |
|------------------|--------------|------------------------------------|
| $x_f$            | cm           | Initial horizontal position        |
| $\dot{x}_f$      | cm/s         | Final horizontal velocity          |
| $y_f$            | cm           | Initial vertical position          |
| $\dot{y}_f$      | cm/s         | Initial vertical velocity          |
| $\theta_f$       | rad          | Final head-thorax angle            |
| $\dot{\theta}_f$ | rad/s        | Final head-thorax angular velocity |
| $\phi_f$         | rad          | Final abdomen angle                |
| $\dot{\phi}_f$   | rad/s        | Final abdomen angular velocity     |
